# Supplementary material for: Increased PD-L1 and T-cell infiltration in the presence of HLA class I expression in metastatic high-grade osteosarcoma: a rationale for T-cell-based immunotherapy
Source: Springer Nature journal article supplement (doi:10.1007/s00262-016-1925-3), 2016-11-16
Supplement: MOESM1 [file 11053372]

**Supplementary Table 1. Overview of patient materials and staining results**

| Patient | Tissue-type | Disease-type  | Time <sup>a</sup> | β2-microglobulin | HCA2          | HC10          | Final HLA score | CD3+CD8- | CD3+CD8+ | CD3+FoxP3+ | PD-L1       |
|---------|-------------|---------------|-------------------|------------------|---------------|---------------|-----------------|----------|----------|------------|-------------|
| 1       | Biopsy      | Primary Tumor | -                 | Positive         | Positive      | Not Defined   | Positive        | 0        | 0        | 0          | Negative    |
|         | Resection   | Primary Tumor | 3                 | Positive         | Heterogeneous | Not Defined   | Heterogeneous   | 8,75     | 4,25     | 1,5        | Negative    |
|         | Biopsy      | Metastasis    | 50                | Positive         | Heterogeneous | Positive      | Positive        | 88,5     | 7,5      | 22         | Positive    |
| 2       | Biopsy      | Primary Tumor | -                 | Heterogeneous    | Heterogeneous | Positive      | Heterogeneous   | 1        | 0,75     | 0          | Negative    |
|         | Resection   | Primary Tumor | 5                 | Heterogeneous    | Heterogeneous | Heterogeneous | Heterogeneous   | 2,75     | 9,75     | 0,25       | Negative    |
|         | Biopsy      | Local Relapse | 36                | Heterogeneous    | Focal Weak    | Positive      | Heterogeneous   | 3,25     | 1,75     | 0          | Negative    |
|         | Resection   | Local Relapse | 37                | Heterogeneous    | Focal Weak    | Heterogeneous | Heterogeneous   | 0,5      | 0        | 0          | Negative    |
|         | Resection   | Metastasis    | 43                | Positive         | Heterogeneous | Heterogeneous | Positive        | 51       | 50,25    | 4,75       | Negative    |
| 3       | Resection   | Primary Tumor | 3                 | Positive         | Heterogeneous | Positive      | Positive        | 0,25     | 0,25     | 0          | Not defined |
|         | Resection   | Primary Tumor | 3                 | Positive         | Heterogeneous | Positive      | Positive        | 6,75     | 9        | 6,5        | Positive    |
|         | Biopsy      | Local Relapse | 40                | Positive         | Heterogeneous | Positive      | Positive        | 15,25    | 24,75    | 4,75       | Positive    |
|         | Resection   | Local Relapse | 41                | Positive         | Heterogeneous | Positive      | Positive        | 20,25    | 7        | 2,75       | Negative    |
|         | Resection   | Metastasis    | 53                | Positive         | Positive      | Positive      | Positive        | 10,5     | 35,5     | 6,5        | Positive    |
|         | Resection   | Metastasis    | 58                | Positive         | Heterogeneous | Positive      | Positive        | 52,5     | 42,25    | 4          | Positive    |
| 4       | Biopsy      | Primary Tumor | -                 | Focal Weak       | Heterogeneous | Focal Weak    | Negative        | 0,25     | 0,25     | 0          | Negative    |
|         | Resection   | Metastasis    | 9                 | Focal Weak       | Not Defined   | Heterogeneous | Negative        | 9        | 11,5     | 2          | Negative    |
|         | Resection   | Metastasis    | 16                | Heterogeneous    | Heterogeneous | Not Defined   | Heterogeneous   | 2        | 4,5      | 0          | Negative    |
|         | Biopsy      | Metastasis    | 21                | Positive         | Heterogeneous | Positive      | Positive        | 1,5      | 0        | 0          | Negative    |
|         | Biopsy      | Local Relapse | 30                | Positive         | Positive      | Positive      | Positive        | 8,75     | 7        | 0,5        | Negative    |
| 5       | Resection   | Primary Tumor | -                 | Positive         | Heterogeneous | Heterogeneous | Positive        | 1        | 3        | 0          | Negative    |
|         | Biopsy      | Local Relapse | 17                | Positive         | Heterogeneous | Focal Weak    | Heterogeneous   | 0        | 0,25     | 1,5        | Negative    |
|         | Resection   | Local Relapse | 19                | Positive         | Heterogeneous | Heterogeneous | Positive        | 0,5      | 0        | 0,75       | Positive    |
|         | Resection   | Local Relapse | 30                | Heterogeneous    | Heterogeneous | Positive      | Heterogeneous   | 8,75     | 9,25     | 8,75       | Negative    |
|         | Resection   | Metastasis    | 37                | Heterogeneous    | Heterogeneous | Heterogeneous | Heterogeneous   | 0        | 0,5      | 0          | Negative    |
| 6       | Biopsy      | Primary Tumor | -                 | Positive         | Heterogeneous | Positive      | Positive        | 24,25    | 23,5     | 0,5        | Positive    |
|         | Resection   | Local Relapse | 32                | Heterogeneous    | Heterogeneous | Positive      | Heterogeneous   | 3,75     | 25,75    | 0          | Negative    |
|         | Resection   | Local Relapse | 42                | Heterogeneous    | Heterogeneous | Heterogeneous | Heterogeneous   | 3,5      | 9,5      | 0,5        | Negative    |
|         | Resection   | Local Relapse | 43                | Heterogeneous    | Heterogeneous | Positive      | Heterogeneous   | 2        | 8        | 0          | Negative    |
|         | Resection   | Local Relapse | 45                | Positive         | Heterogeneous | Positive      | Positive        | 2        | 8,5      | 0          | Negative    |
|         | Resection   | Metastasis    | 87                | Positive         | Heterogeneous | Positive      | Positive        | 20       | 47,5     | 1          | Positive    |
| 7       | Biopsy      | Primary Tumor | -                 | Heterogeneous    | Heterogeneous | Positive      | Heterogeneous   | 33,5     | 65,5     | 8,75       | Negative    |
|         | Resection   | Primary Tumor | 2                 | Positive         | Heterogeneous | Positive      | Positive        | 77,25    | 81       | 3,75       | Negative    |
|         | Biopsy      | Local Relapse | 5                 | Focal Weak       | Focal Weak    | Heterogeneous | Negative        | 22,5     | 50       | 17,75      | Negative    |
|         | Resection   | Metastasis    | 6                 | Positive         | Heterogeneous | Positive      | Positive        | 12,25    | 17,5     | 8,75       | Positive    |
|         | Resection   | Metastasis    | 8                 | Not Defined      | Not Defined   | Not Defined   | Not defined     | 19,5     | 74,5     | 6,5        | Positive    |
|         | Resection   | Metastasis    | 8                 | Heterogeneous    | Not Defined   | Heterogeneous | Heterogeneous   | 171      | 87,75    | 8,25       | Positive    |
|         | Resection   | Metastasis    | 10                | Heterogeneous    | Heterogeneous | Positive      | Heterogeneous   | 17,75    | 39,25    | 18         | Positive    |
| 8       | Biopsy      | Primary Tumor | -                 | Heterogeneous    | Heterogeneous | Positive      | Heterogeneous   | 2        | 2        | 0          | Negative    |
|         | Resection   | Primary Tumor | 3                 | Heterogeneous    | Heterogeneous | Heterogeneous | Not defined     | 6,75     | 7,25     | 0          | Negative    |
|         | Resection   | Metastasis    | 5                 | Positive         | Heterogeneous | Positive      | Positive        | 15       | 111,25   | 6,75       | Positive    |
|         | Resection   | Metastasis    | 7                 | Focal Weak       | Heterogeneous | Heterogeneous | Negative        | 6,5      | 5,25     | 0,5        | Not defined |
|         | Resection   | Local Relapse | 8                 | Heterogeneous    | Heterogeneous | Positive      | Heterogeneous   | 5,25     | 14,5     | 0,5        | Not defined |
|         | Resection   | Local Relapse | 8                 | Heterogeneous    | Heterogeneous | Heterogeneous | Heterogeneous   | 2,75     | 1,75     | 0          | Negative    |

|     |           |               |    |               |               |               |               |       |       |       |             |
|-----|-----------|---------------|----|---------------|---------------|---------------|---------------|-------|-------|-------|-------------|
| 9   | Resection | Primary Tumor | 3  | Positive      | Focal Weak    | Not Defined   | Not defined   | 1,75  | 1,75  | 0     | Negative    |
|     | Biopsy    | Local Relapse | 4  | Heterogeneous | Heterogeneous | Positive      | Heterogeneous | 0,5   | 0     | 0     | Negative    |
|     | Resection | Local Relapse | 4  | Positive      | Heterogeneous | Heterogeneous | Positive      | 7     | 4     | 1,25  | Positive    |
|     | Biopsy    | Metastasis    | 6  | Heterogeneous | Heterogeneous | Heterogeneous | Heterogeneous | 56,75 | 78,25 | 8,75  | Positive    |
| 10  | Biopsy    | Primary Tumor | -  | Positive      | Heterogeneous | Positive      | Positive      | 0,25  | 0,25  | 0     | Negative    |
|     | Resection | Local Relapse | 34 | Positive      | Focal Weak    | Positive      | Positive      | 7     | 8,75  | 0,25  | Negative    |
|     | Resection | Local Relapse | 45 | Positive      | Heterogeneous | Positive      | Positive      | 8     | 18,5  | 11,75 | Positive    |
|     | Resection | Metastasis    | 91 | Positive      | Heterogeneous | Positive      | Positive      | 97,75 | 78,75 | 5,5   | Positive    |
| 11* | Resection | Metastasis    | 3  | Positive      | Positive      | Positive      | Positive      | 111,5 | 29    | 1,25  | Negative    |
|     | Resection | Metastasis    | 9  | Positive      | Positive      | Positive      | Positive      | 61,5  | 51,25 | 2,5   | Negative    |
|     | Resection | Metastasis    | 14 | Positive      | Positive      | Positive      | Positive      | 6     | 23    | 0     | Negative    |
|     | Biopsy    | Metastasis    | 37 | Positive      | Heterogeneous | Positive      | Positive      | 2,5   | 0,5   | 0,75  | Negative    |
|     | Resection | Local Relapse | 38 | Positive      | Heterogeneous | Positive      | Positive      | 12,25 | 15,25 | 3,75  | Positive    |
| 12* | Biopsy    | Primary Tumor | -  | Positive      | Positive      | Positive      | Positive      | 9     | 4,5   | 1,5   | Negative    |
|     | Resection | Primary Tumor | 2  | Positive      | Positive      | Positive      | Positive      | 5,25  | 0,75  | 0,75  | Negative    |
|     | Resection | Metastasis    | 11 | Not Defined   | Positive      | Not Defined   | Not defined   | 35,25 | 59    | 3,5   | Positive    |
|     | Biopsy    | Local Relapse | 12 | Positive      | Heterogeneous | Positive      | Positive      | 0,5   | 0     | 0     | Negative    |
| 13* | Biopsy    | Primary Tumor | -  | Positive      | Positive      | Positive      | Positive      | 0,5   | 0     | 0     | Negative    |
|     | Resection | Primary Tumor | 2  | Positive      | Positive      | Positive      | Positive      | 2,5   | 3,75  | 0,5   | Negative    |
|     | Resection | Local Relapse | 3  | Positive      | Heterogeneous | Positive      | Positive      | 2,25  | 2,25  | 0     | Positive    |
|     | Biopsy    | Metastasis    | 5  | Positive      | Heterogeneous | Positive      | Positive      | 4     | 1,25  | 0     | Negative    |
|     | Resection | Local Relapse | 19 | Positive      | Positive      | Positive      | Positive      | 0,5   | 0     | 0     | Negative    |
| 14  | Biopsy    | Primary Tumor | -  | Positive      | Heterogeneous | Positive      | Positive      | 1,5   | 0,75  | 0     | Positive    |
|     | Resection | Local Relapse | 12 | Positive      | Positive      | Positive      | Positive      | 20,5  | 12    | 0,75  | Negative    |
| 15* | Resection | Metastasis    | 4  | Positive      | Heterogeneous | Positive      | Positive      | 31,75 | 14    | 0,25  | Negative    |
| 16  | Biopsy    | Primary Tumor | -  | Positive      | Heterogeneous | Positive      | Positive      | 23,75 | 9     | 0,5   | Negative    |
| 17  | Biopsy    | Primary Tumor | -  | Heterogeneous | Heterogeneous | Positive      | Heterogeneous | 20    | 18,75 | 3,75  | Negative    |
|     | Resection | Primary Tumor | 3  | Positive      | Positive      | Positive      | Positive      | 11,75 | 7,5   | 0     | Negative    |
| 18  | Resection | Primary Tumor | 3  | Positive      | Positive      | Positive      | Positive      | 0     | 0     | 0     | Negative    |
| 19  | Biopsy    | Primary Tumor | -  | Heterogeneous | Heterogeneous | Positive      | Heterogeneous | 5,75  | 1,5   | 0,25  | Not defined |
|     | Resection | Primary Tumor | 3  | Heterogeneous | Heterogeneous | Heterogeneous | Heterogeneous | 30,5  | 21,5  | 0     | Negative    |
| 20  | Biopsy    | Primary Tumor | -  | Heterogeneous | Focal Weak    | Heterogeneous | Heterogeneous | 18,75 | 11    | 0     | Negative    |
|     | Resection | Primary Tumor | 3  | Heterogeneous | Focal Weak    | Heterogeneous | Heterogeneous | 14    | 7     | 0     | Negative    |
| 21  | Biopsy    | Primary Tumor | -  | Positive      | Focal Weak    | Positive      | Positive      | 1,75  | 0     | 0     | Not defined |
|     | Resection | Primary Tumor | 2  | Positive      | Heterogeneous | Heterogeneous | Positive      | 5,5   | 2,25  | 0,25  | Negative    |
|     | Resection | Local Relapse | 10 | Heterogeneous | Heterogeneous | Heterogeneous | Not defined   | 0,5   | 0     | 0     | Negative    |
| 22  | Resection | Primary Tumor | 2  | Focal Weak    | Heterogeneous | Heterogeneous | Negative      | 0,25  | 0,25  | 0     | Not defined |
|     | Resection | Metastasis    | 14 | Heterogeneous | Heterogeneous | Heterogeneous | Heterogeneous | 34,75 | 40,25 | 3,25  | Negative    |
| 23  | Biopsy    | Primary Tumor | -  | Heterogeneous | Positive      | Positive      | Heterogeneous | 0     | 0,25  | 0     | Positive    |
| 24* | Resection | Primary Tumor | 3  | Heterogeneous | Focal Weak    | Heterogeneous | Heterogeneous | 3,5   | 4,25  | 0,25  | Negative    |
|     | Resection | Metastasis    | 6  | Heterogeneous | Heterogeneous | Focal Weak    | Heterogeneous | 7     | 2     | 0,5   | Negative    |
| 25  | Resection | Primary Tumor | 3  | Heterogeneous | Heterogeneous | Heterogeneous | Heterogeneous | 5,25  | 4     | 0,5   | Negative    |

ª indicates time from initial diagnosis (months); \* indicates metastasis present at the time of initial diagnosis

**Supplementary Table 2. HLA class I status during osteosarcoma progression**

| Patient         | HLA class I expression status |                       |                            |
|-----------------|-------------------------------|-----------------------|----------------------------|
|                 | Primary tumour                | Local relapse         | Metastases                 |
| 1               | heterogeneous <sup>a</sup>    | NA                    | positive <sup>b</sup>      |
| 2               | heterogeneous                 | heterogeneous         | positive                   |
| 3               | positive                      | positive              | positive                   |
| 4               | negative <sup>b</sup>         | positive <sup>b</sup> | negative                   |
|                 |                               |                       | heterogeneous              |
|                 |                               |                       | positive <sup>b</sup>      |
| 5               | positive                      | positive              | heterogeneous              |
|                 |                               | heterogeneous         |                            |
| 6               | positive <sup>b</sup>         | positive              | positive                   |
| 7               | positive <sup>a</sup>         | negative <sup>b</sup> | positive                   |
|                 |                               |                       | heterogeneous              |
| 8               | heterogeneous <sup>b</sup>    | heterogeneous         | negative                   |
|                 |                               |                       | positive                   |
| 9               | NA                            | positive              | heterogeneous <sup>b</sup> |
| 10              | positive <sup>b</sup>         | positive              | positive                   |
| 11 <sup>c</sup> | NA                            | positive              | positive                   |
| 12 <sup>c</sup> | positive                      | positive <sup>b</sup> | NA                         |
| 13 <sup>c</sup> | positive                      | positive              | positive                   |
| 14              | positive                      | positive              | NA                         |
| 21              | positive                      | heterogeneous         | NA                         |
| 24 <sup>c</sup> | heterogeneous                 | NA                    | heterogeneous              |

<sup>a</sup> discrepancy between biopsy and surgical resection specimen

<sup>b</sup> determined on biopsy samples

<sup>c</sup> patient with metastatic disease at diagnosis

NA: not applicable

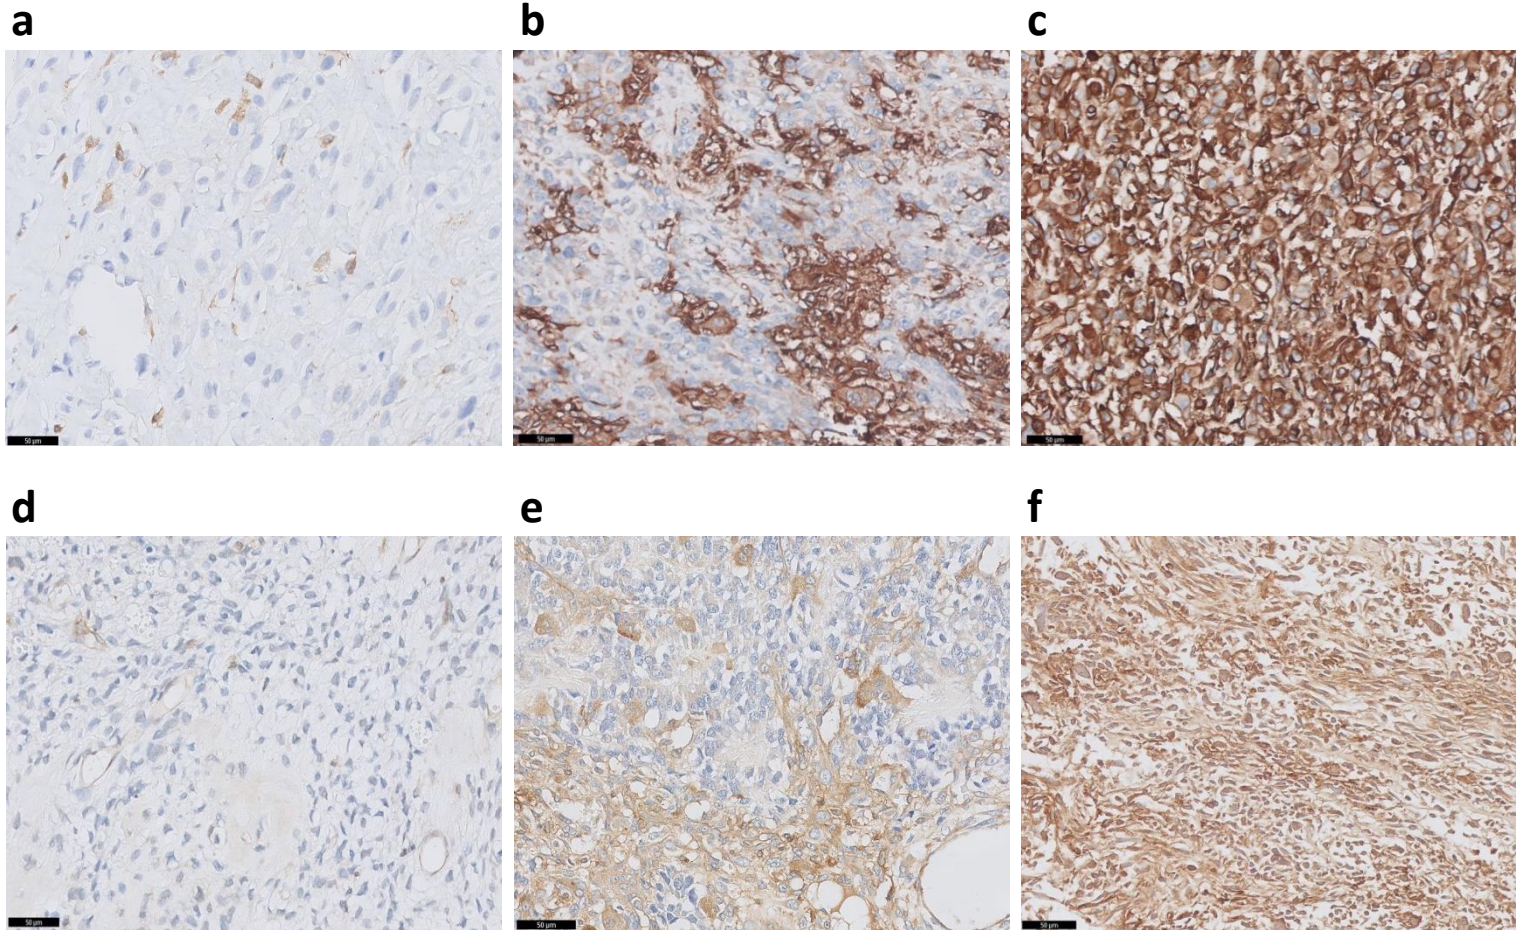

**Supplementary Fig. 1 HLA-B/C and  $\beta$ 2-microglobulin immunostaining in osteosarcoma**

Representative staining patterns of HLA-B/C (**a-c**) and  $\beta$ 2-microglobulin (**d-f**) expression using immunohistochemistry: negative/weak expression with endothelial cells as positive internal controls (**a,d**), heterogeneous expression with both negative and positive regions (**b,e**) and diffuse positive expression (**c,f**). Scale bars, 50 $\mu$ m.



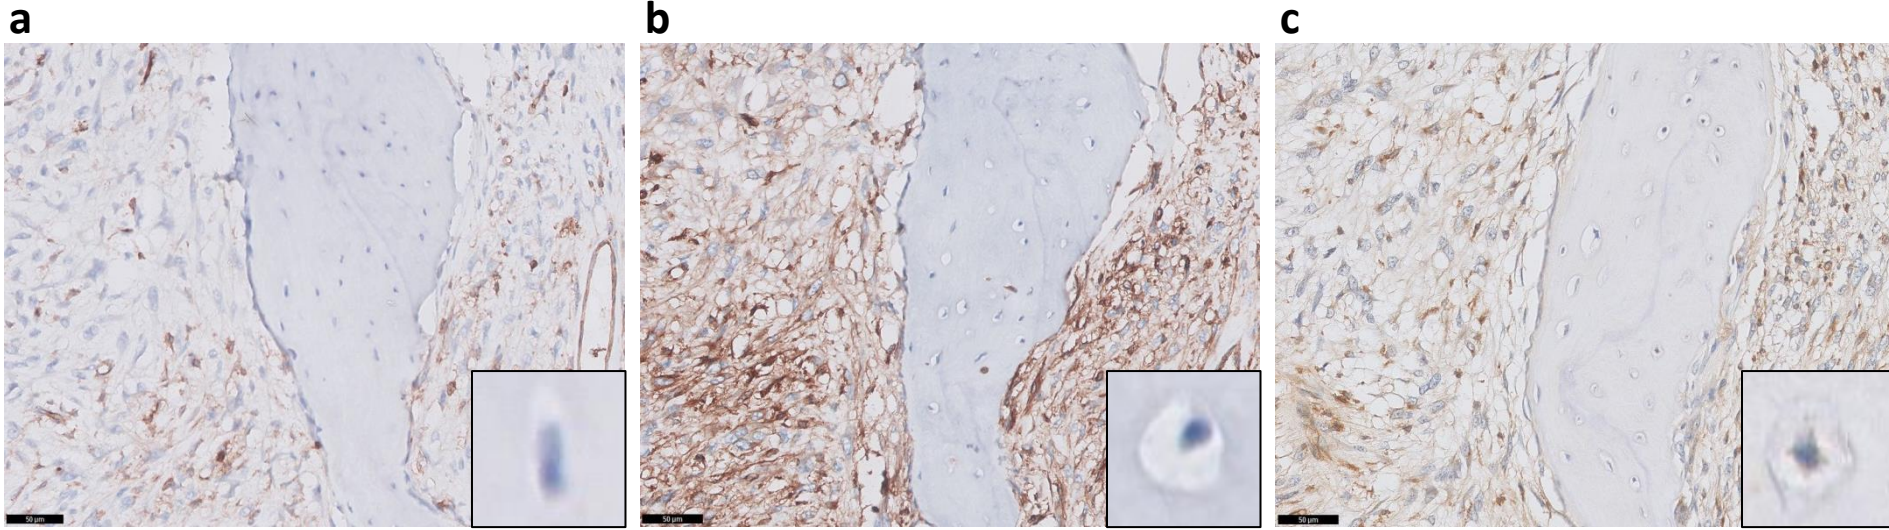

**Supplementary Fig. 2 HLA class I expression in bone cells**

Representative images of HLA-A (a), HLA-B/C (b) and  $\beta$ 2-microglobulin (c) staining on normal bone, when present in tumour sections. Scale bars, 50 $\mu$ m.

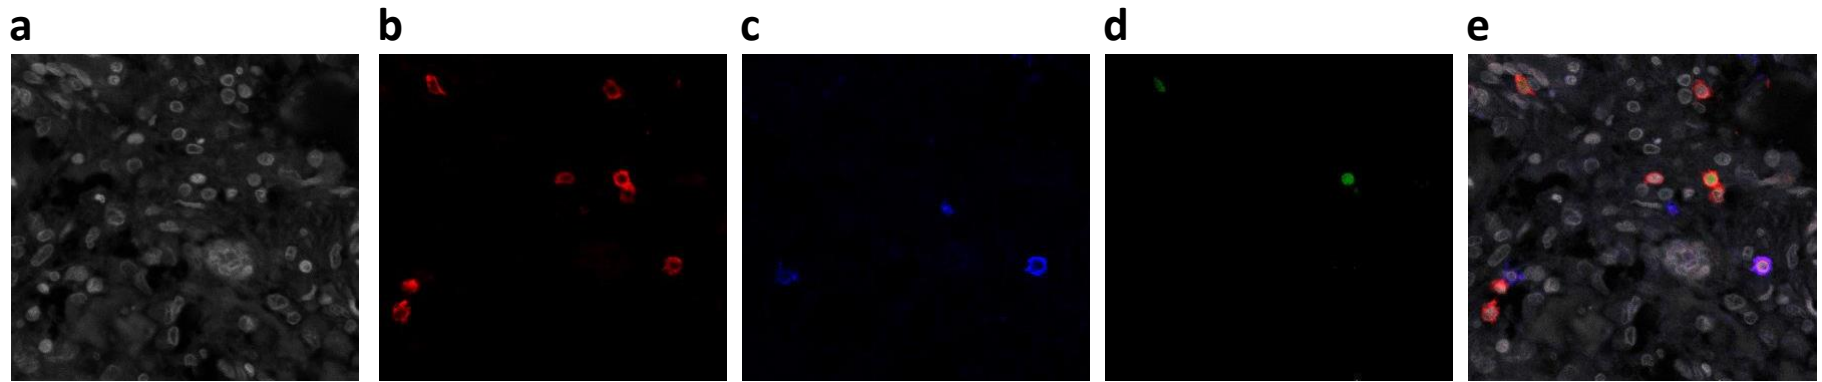

### Supplementary Fig. 3 Immunofluorescent staining for T-cell characterisation

Representative images of primary osteosarcoma stained for DAPI (grey, **a**), CD3 (red, **b**), CD8 (blue, **c**), FOXP3 (green, **d**) and the merged picture (**e**). CD3<sup>+</sup>CD8<sup>-</sup> T cells are characterised by a membranous red staining, CD3<sup>+</sup>CD8<sup>+</sup> T cells by a membranous purple staining and CD3<sup>+</sup>CD8<sup>-</sup>FOXP3<sup>+</sup> T cells by a nuclear green staining associated with a membranous red staining. We did not observed cells double positive for CD8 and FOXP3.

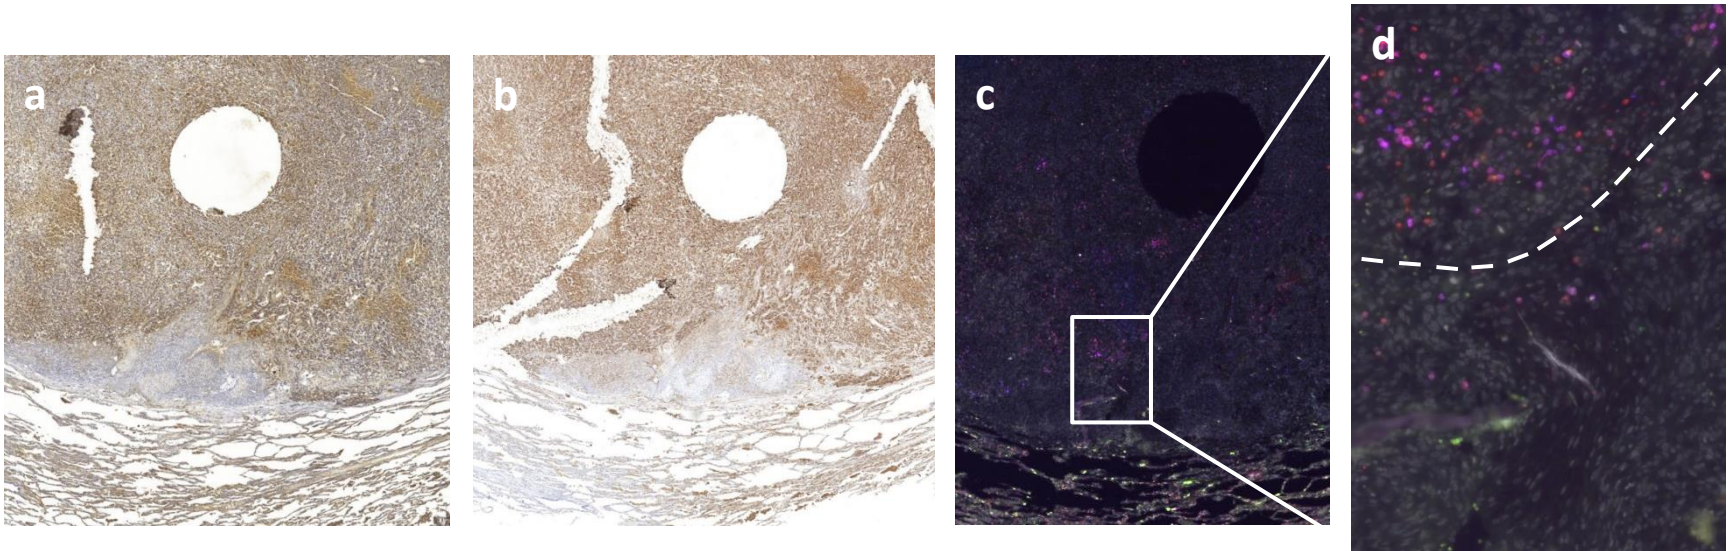

#### **Supplementary Fig. 4 HLA class I expression colocalised with T-cell infiltration**

Tumour areas with HLA class I positivity were frequently highly infiltrated with T cells compared HLA negative regions. Consecutive sections were stained for HLA class I using  $\beta$ 2-microglobulin (**a**), HCA2 (**b**) and HC10 antibodies, then scanned using a Philips Ultra-Fast Scanner 1.6 RA. Triple fluorescent staining CD3-CD8-FOXP3 was used to detect and characterise T cells and the slides were scanned using a Panoramic MIDI scanner (**c,d**) to assess colocalisation with HLA class I positive regions.

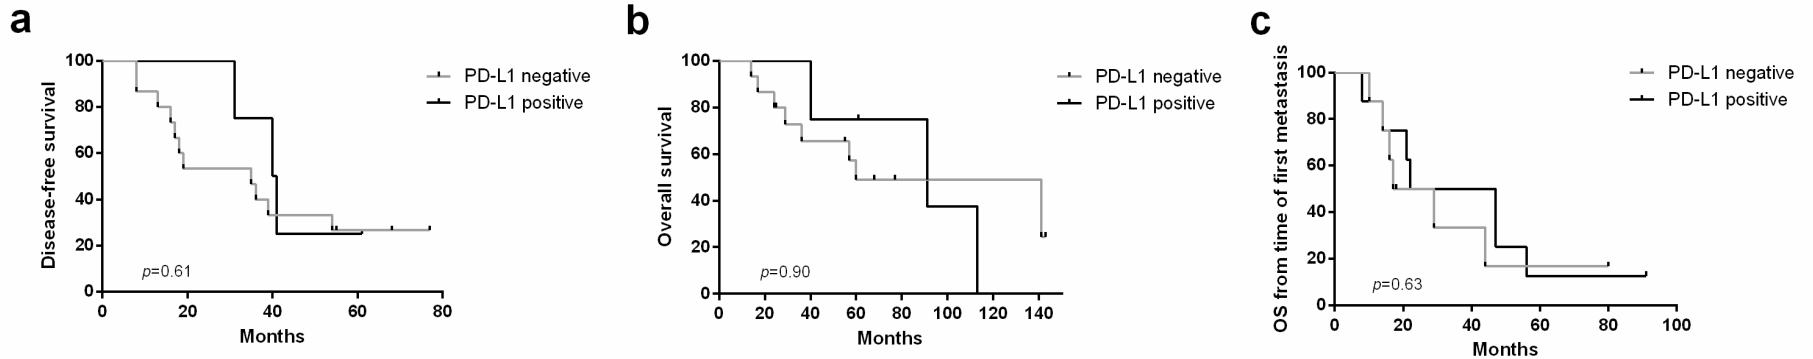

**Supplementary Fig. 5 No correlation between PD-L1 expression and patient survival**

Kaplan-Meier survival curves for disease-free survival (**a**) and overall survival (**b**) according to PD-L1 expression in the primary tumour, and overall survival from time of first metastasis (**c**) according to PD-L1 status in the first metastatic lesion. *P* value obtained by log-rank test.
